# Supplementary material
Source: MDPI journal article supplement (https://www.mdpi.com/2673-8007/4/1/23)
Supplement: s1 [file s1]

# Supplementary Materials:

**Table S1.** Primer sequences and modifications.

|        | Name | 1 RxN Conc.<br>( $\mu$ M) | Sequence (5' – 3')                                     |
|--------|------|---------------------------|--------------------------------------------------------|
| IS900  | F3   | 0.16                      | CGCAACGCCGATACCGT                                      |
|        | B3   | 0.16                      | CCCAGGATGACGCCGAA                                      |
|        | FIP  | 1.6                       | <u>CATCACCTCCTTGGCCAGGC</u> -CCGCTAACGCCCAACAC         |
|        | BIP  | 1.6                       | <u>GCGACACCGACGCGATGAT</u> -TCCGGGCATGCTCAGGA          |
|        | LF   | 0.8                       | AGTGGCCGCCAGTTGTTG                                     |
|        | LR   | 0.8                       | ACCGCCACGCCGAAATC                                      |
| IS6110 | F3   | 0.2                       | AGACCTCACCTATGTGTCGA                                   |
|        | B3   | 0.2                       | TCGCTGAACCGGATCGA                                      |
|        | FIP  | 1.6                       | <u>ATGGAGGTGGCCATCGTGGAAG</u> -<br>CCTACGTGGCCTTTGTCAC |
|        | BIP  | 1.6                       | <u>AAGCCATCTGGACCCGCCAA</u> -CCCCTATCGTATGGTGGAT       |
|        | LF   | 0.8                       | AGGATCCTGCGAGCGTAG                                     |
|        | LR   | 0.8                       | AAGAAGGCGTACTCGACCTG                                   |
| RD4    | F3   | 0.6                       | GCCGCTCCCAAAAATTACCA                                   |
|        | B3   | 0.6                       | GACGCTACTACGGCACGG                                     |
|        | FIP  | 3.6                       | AGGCCACTCCAAGAGTGTGCG-<br>TGACGCCTTCCTAACCAGA          |
|        | BIP  | 3.6                       | GCGCGGGCGTACCGGATAT-GCGCCCCGTAGCGTTA                   |
|        | LF   | 4.8                       | CTTCTGCACGACTACGGCT                                    |
|        | LR   | 4.8                       | AGCCATTTTTCAGCAATTTCTCAG                               |

Underlining denotes nucleotide phosphorothioation.

RxN Conc.: Reaction concentration.

**Table S2.** Cost per Phage-LAMP reaction.

| Component        | Cost per RxN (\$) |
|------------------|-------------------|
| LAMP MM          | 2.28              |
| LAMP primers     | 0.17              |
| Phage            | 5                 |
| MolYsis™ Basic 5 | 5                 |
| <b>Total</b>     | <b>12.45</b>      |
